# Supplementary material for: Ammonium is a key determinant on the dietary restriction of yeast chronological aging in culture medium
Source: PubMed Central journal article supplement (PMC4466630; doi:10.18632/oncotarget.2989), 2014-12-03
Supplement: oncotarget-06-6511-s001.pdf [file oncotarget-06-6511-s001.pdf]

## Ammonium is a key determinant on the dietary restriction of yeast chronological aging in culture medium

### Supplemental Material

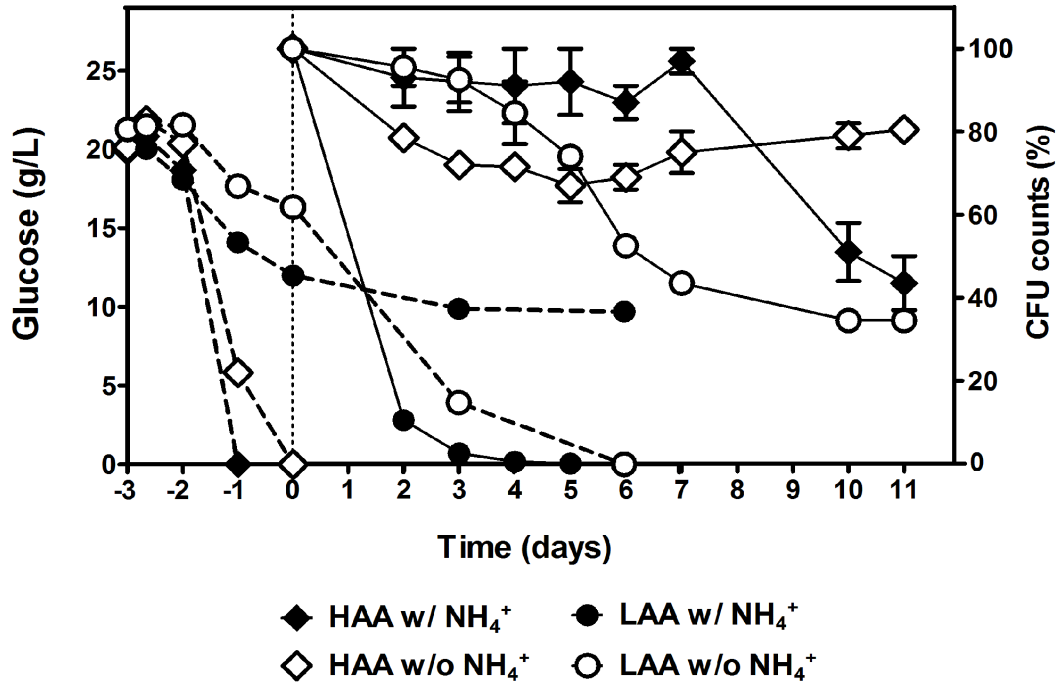

**Figure S1: CLS shortening under amino acid restriction is reverted by removing the ammonium from culture medium (non-buffered SD medium).** Glucose consumption and survival of wild-type *S. cerevisiae* BY4742 cultured in SD media with 2% and supplemented with: high and low concentrations of auxotrophy-complementing amino acids (HAA and LAA, respectively), and with (w/) or without (w/o) NH<sub>4</sub><sup>+</sup> [0.5%, (NH<sub>4</sub>)<sub>2</sub>SO<sub>4</sub>]. In all the cultures, starting cell density was about 3.8 x 10<sup>7</sup> cells/ml. Day -3 represents the day of culture inoculation and day zero represents the beginning of aging experiments. Values are means ± SEM (n=3)

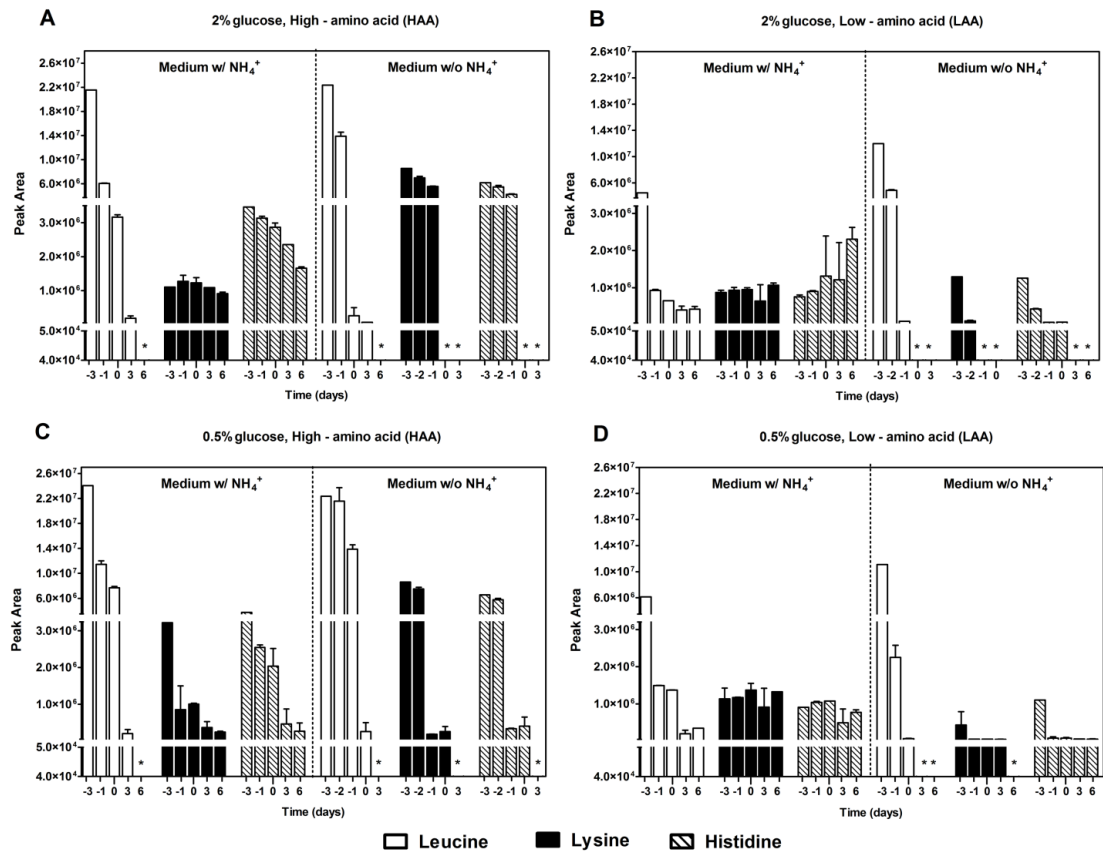

**Figure S2: Ammonium, when present in the culture medium, impaired the consumption of the auxotrophy-complementing amino acids, in media buffered to pH 6.0.** Leucine, lysine and histidine consumption by *S. cerevisiae* BY4742 cultured in SD media buffered to pH 6.0 with 2% (A and B) or 0.5% (C and D) glucose, supplemented with: high (A and C) and low (B and D) concentrations of auxotrophy-complementing amino acids (HAA and LAA, respectively), and with (w/) or without (w/o) NH<sub>4</sub><sup>+</sup> [0.5%, (NH<sub>4</sub>)<sub>2</sub>SO<sub>4</sub>]. Day -3 represents the day of culture inoculation and day zero represents the beginning of aging experiments. \*(Peak values below detection limit  $\approx$  0). Values are means  $\pm$  SEM (n=3)
